# Supplementary material for: Revealing the Mutation Patterns of Drug-Resistant Reverse Transcriptase Variants of Human Immunodeficiency Virus through Proteochemometric Modeling
Source: MDPI journal article supplement (doi:10.3390/biom11091302), 2021-09-02
Supplement: s1 [file s1]

## Supplementary

**Table S1.** The cutoff and range of fold resistance for each drugs.

| drug | Cutoff for fold re-sistance <sup>[1]</sup> | The minimum of fold re-sistance | The maximum of fold re-sistance | Number of drug-susceptible pairs | Number of drug-resistant pairs |
|------|--------------------------------------------|---------------------------------|---------------------------------|----------------------------------|--------------------------------|
| 3TC  | 1.5                                        | 0.5                             | 100                             | 446                              | 1192                           |
| ABC  | 4.5                                        | 0.5                             | 100                             | 978                              | 595                            |
| AZT  | 2.2                                        | 0.1                             | 100                             | 846                              | 813                            |
| D4T  | 1.7                                        | 0.4                             | 100                             | 1046                             | 623                            |
| DDI  | 1.7                                        | 0.4                             | 100                             | 1071                             | 598                            |
| TDF  | 1.5                                        | 0.2                             | 100                             | 930                              | 400                            |

**Table S2.** Data distribution of different classes.

| Dataset          | Susceptible variants | Resistant variants | Total |
|------------------|----------------------|--------------------|-------|
| Training dataset | 4250                 | 3375               | 7625  |
| Testing dataset  | 1067                 | 846                | 1913  |

**Table S3.** List of 47 mutation sites.

| Site |
|------|------|------|------|------|------|------|------|
| 20   | 35   | 39   | 41   | 43   | 44   | 60   | 67   |
| 69   | 70   | 74   | 83   | 98   | 101  | 102  | 103  |
| 118  | 122  | 123  | 135  | 142  | 162  | 174  | 177  |
| 178  | 179  | 181  | 184  | 190  | 196  | 200  | 202  |
| 203  | 207  | 208  | 210  | 211  | 214  | 215  | 219  |
| 228  | 245  | 272  | 277  | 286  | 293  | 297  |      |

**Table S4.** Z-scale for 20 amino acids.

| no. | abbrev | name          | z1    | z2    | z3    | z4    | z5    |
|-----|--------|---------------|-------|-------|-------|-------|-------|
| 1   | Ala    | alanine       | 0.24  | -2.32 | 0.6   | -0.14 | 1.3   |
| 2   | Arg    | arginine      | 3.52  | 2.5   | -3.5  | 1.99  | -0.17 |
| 3   | Asn    | asparagine    | 3.05  | 1.62  | 1.04  | -1.15 | 1.61  |
| 4   | Asp    | aspartic acid | 3.98  | 0.93  | 1.93  | -2.46 | 0.75  |
| 5   | Cys    | cysteine      | 0.84  | -1.67 | 3.71  | 0.18  | -2.65 |
| 6   | Gln    | glutamine     | 1.75  | 0.5   | -1.44 | -1.34 | 0.66  |
| 7   | Glu    | glutamic acid | 3.11  | 0.26  | -0.11 | -3.04 | -0.25 |
| 8   | Gly    | glycine       | 2.05  | -4.06 | 0.36  | -0.82 | -0.38 |
| 9   | His    | histidine     | 2.47  | 1.95  | 0.26  | 3.9   | 0.09  |
| 10  | Ile    | isoleucine    | -3.89 | -1.73 | -1.71 | -0.84 | 0.26  |
| 11  | Leu    | leucine       | -4.28 | -1.3  | -1.49 | -0.72 | 0.84  |
| 12  | Lys    | lysine        | 2.29  | 0.89  | -2.49 | 1.49  | 0.31  |
| 13  | Met    | methionine    | -2.85 | -0.22 | 0.47  | 1.94  | -0.98 |
| 14  | Phe    | phenylalanine | -4.22 | 1.94  | 1.06  | 0.54  | -0.62 |
| 15  | Pro    | proline       | -1.66 | 0.27  | 1.84  | 0.7   | 2     |
| 16  | Ser    | serine        | 2.39  | -1.07 | 1.15  | -1.39 | 0.67  |
| 17  | Thr    | threonine     | 0.75  | -2.18 | -1.12 | -1.46 | -0.4  |
| 18  | Trp    | tryptophan    | -4.36 | 3.94  | 0.59  | 3.44  | -1.59 |
| 19  | Tyr    | tyrosine      | -2.54 | 2.44  | 0.43  | 0.04  | -1.47 |
| 20  | Val    | valine        | -2.59 | -2.64 | -1.54 | -0.85 | -0.02 |

**Table S5.** Description of the 200-bit drug descriptors calculated by RDKit.

| NO    | Name                                                                          | Description                                                                                                                                                                          |
|-------|-------------------------------------------------------------------------------|--------------------------------------------------------------------------------------------------------------------------------------------------------------------------------------|
| 1     | qed                                                                           | Calculate the weighted sum of ADS mapped properties.                                                                                                                                 |
| 2     | MinAbsPartialCharge                                                           | No specific description, calculated from the function of rdkit.Chem.Descriptors.MinAbsPartialCharge(mol, force=False).                                                               |
| 3     | NumRadicalElectrons                                                           | The number of radical electrons the molecule has.                                                                                                                                    |
| 4     | FpDensityMorgan1                                                              | No specific description, calculated from the function of rdkit.Chem.Descriptors.FpDensityMorgan1(x).                                                                                 |
| 5     | FpDensityMorgan2                                                              | No specific description, calculated from the function of rdkit.Chem.Descriptors.FpDensityMorgan2(x).                                                                                 |
| 6     | FpDensityMorgan3                                                              | No specific description, calculated from the function of rdkit.Chem.Descriptors.FpDensityMorgan3(x).                                                                                 |
| 7     | MinPartialCharge                                                              | No specific description, calculated from the function of rdkit.Chem.Descriptors.MinPartialCharge(mol, force=False).                                                                  |
| 8     | MaxPartialCharge                                                              | No specific description, calculated from the function of rdkit.Chem.Descriptors.MaxPartialCharge(mol, force=False).                                                                  |
| 9     | HeavyAtomMolWt                                                                | The average molecular weight of the molecule ignoring hydrogens.                                                                                                                     |
| 10~13 | MaxAbsEStateIndex,<br>MinEStateIndex,<br>MinAbsEStateIndex,<br>MaxEStateIndex | Basic EState definitions from the paper [Hall, Mohny and Kier. JCIICS,31:76-81(1991)].                                                                                               |
| 14    | MaxAbsPartialCharge                                                           | No specific description, calculated from the function of rdkit.Chem.Descriptors.MaxAbsPartialCharge(mol, force=False).                                                               |
| 15    | ExactMolWt                                                                    | The exact molecular weight of the molecule.                                                                                                                                          |
| 16    | MolWt                                                                         | The average molecular weight of the molecule.                                                                                                                                        |
| 17    | NumValenceElectrons                                                           | The number of valence electrons the molecule has.                                                                                                                                    |
| 18    | BalabanJ                                                                      | Calculate Balaban's J value for a molecule[Chem. Phys. Lett. 89:399-404 (1982)].                                                                                                     |
| 19    | BertzCT                                                                       | Complexity of the bonding, and the complexity of the distribution of heteroatoms.[J. Am. Chem. Soc. 103:3599-601 (1981)].                                                            |
| 20~36 | Chi0-Chi1,<br>Chi0n-Chi4n,<br>Chi0v-Chi4v,<br>HallKierAlpha,<br>Kappa1~Kappa3 | Definitions from the paper[Rev. Comput. Chem. 2:367-422 (1991)].                                                                                                                     |
| 37    | Ipc                                                                           | The coefficients of the characteristic polynomial of the adjacency matrix of a hydrogen-suppressed graph of a molecule.                                                              |
| 38    | LabuteASA                                                                     | Calculates Labute's Approximate Surface Area.                                                                                                                                        |
| 39~52 | PEOE_VSA1~PEOE_VSA14                                                          | MOE-type descriptors using partial charges and surface area contributions <a href="http://www.chemcomp.com/journal/vsadesc.htm">http://www.chemcomp.com/journal/vsadesc.htm</a> .    |
| 53~62 | SMR_VSA1~SMR_VSA10                                                            | MOE-type descriptors using MR contributions and surface area contributions <a href="http://www.chemcomp.com/journal/vsadesc.htm">http://www.chemcomp.com/journal/vsadesc.htm</a> .   |
| 63~73 | SlogP_VSA1~SlogP_VSA12                                                        | MOE-type descriptors using LogP contributions and surface area contributions <a href="http://www.chemcomp.com/journal/vsadesc.htm">http://www.chemcomp.com/journal/vsadesc.htm</a> . |
| 74    | TPSA                                                                          | J. Med. Chem. 43:3714-7, (2000).                                                                                                                                                     |
| 75~95 | EState_VSA1~EState_VSA11,<br>VSA_EState1~VSA_EState10                         | MOE-type descriptors using EState indices and surface area contributions.                                                                                                            |
| 96    | FractionCSP3                                                                  | The fraction of carbons that are sp3 hybridized.                                                                                                                                     |
| 97    | HeavyAtomCount                                                                | Number of heavy atoms a molecule.                                                                                                                                                    |
| 98    | NHCount                                                                       | Number of NHs or OHs.                                                                                                                                                                |
| 99    | NOCCount                                                                      | Number of Nitrogens and Oxygens.                                                                                                                                                     |
| 100   | NumAliphaticCarbocycles                                                       | The number of aliphatic (containing at least one non-aromatic bond) carbocycles for a molecule.                                                                                      |
| 101   | NumAliphaticHeterocycles                                                      | The number of aliphatic (containing at least one non-aromatic bond) heterocycles for a molecule.                                                                                     |
| 102   | NumAliphaticRings                                                             | The number of aliphatic (containing at least one non-aromatic bond) rings for a molecule.                                                                                            |
| 103   | NumAromaticCarbocycles                                                        | The number of aromatic carbocycles for a molecule.                                                                                                                                   |
| 104   | NumAromaticHeterocycles                                                       | The number of aromatic heterocycles for a molecule.                                                                                                                                  |
| 105   | NumAromaticRings                                                              | The number of aromatic rings for a molecule.                                                                                                                                         |
| 106   | NumHAcceptors                                                                 | Number of Hydrogen Bond Acceptors.                                                                                                                                                   |
| 107   | NumHDonors                                                                    | Number of Hydrogen Bond Donors.                                                                                                                                                      |
| 108   | NumHeteroatoms                                                                | Number of Heteroatoms.                                                                                                                                                               |
| 109   | NumRotatableBonds                                                             | Number of Rotatable Bonds.                                                                                                                                                           |
| 110   | NumSaturatedCarbocycles                                                       | The number of saturated carbocycles for a molecule.                                                                                                                                  |
| 111   | NumSaturatedHeterocycles                                                      | The number of saturated heterocycles for a molecule.                                                                                                                                 |
| 112   | NumSaturatedRings                                                             | The number of saturated rings for a molecule.                                                                                                                                        |
| 113   | RingCount                                                                     | The query match the ring count.                                                                                                                                                      |
| 114   | MolLogP                                                                       | Wildman and Crippen JCIICS 39:868-73 (1999).                                                                                                                                         |

|     |                        |                                                                                     |
|-----|------------------------|-------------------------------------------------------------------------------------|
| 115 | MolMR                  | Wildman and Crippen JCICS 39:868-73 (1999).                                         |
| 116 | fr_Al_COO              | Number of aliphatic carboxylic acids.                                               |
| 117 | fr_Al_OH               | Number of aliphatic hydroxyl groups.                                                |
| 118 | fr_Al_OH_noTert        | Number of aliphatic hydroxyl groups excluding tert-OH.                              |
| 119 | fr_ArN                 | Number of N functional groups attached to aromatics.                                |
| 120 | fr_Ar_COO              | Number of Aromatic carboxylic acid.                                                 |
| 121 | fr_Ar_N                | Number of aromatic nitrogens.                                                       |
| 122 | fr_Ar_NH               | Number of aromatic amines.                                                          |
| 123 | fr_Ar_OH               | Number of aromatic hydroxyl groups.                                                 |
| 124 | fr_COO                 | Number of carboxylic acids.                                                         |
| 125 | fr_COO2                | Number of carboxylic acids.                                                         |
| 126 | fr_C_O                 | Number of carbonyl O.                                                               |
| 127 | fr_C_O_noCOO           | Number of carbonyl O, excluding COOH.                                               |
| 128 | fr_C_S                 | Number of thiocarbonyl.                                                             |
| 129 | fr_HOCCN               | Number of C(OH)CCN-Ctert-alkyl or C(OH)CCNcyclic.                                   |
| 130 | fr_Iimine              | Number of Imines.                                                                   |
| 131 | fr_NH0                 | Number of Tertiary amines.                                                          |
| 132 | fr_NH1                 | Number of Secondary amines.                                                         |
| 133 | fr_NH2                 | Number of Primary amines.                                                           |
| 134 | fr_N_O                 | Number of hydroxylamine groups.                                                     |
| 135 | fr_Ndealkylation1      | Number of XCCNR groups.                                                             |
| 136 | fr_Ndealkylation2      | Number of tert-alicyclic amines (no heteroatoms, not quinine-like bridged N).       |
| 137 | fr_Nhpyrrole           | Number of H-pyrrole nitrogens.                                                      |
| 138 | fr_SH                  | Number of thiol groups.                                                             |
| 139 | fr_aldehyde            | Number of aldehydes.                                                                |
| 140 | fr_alkyl_carbamate     | Number of alkyl carbamates (subject to hydrolysis).                                 |
| 141 | fr_alkyl_halide        | Number of alkyl halides.                                                            |
| 142 | fr_allylic_oxid        | Number of allylic oxidation sites excluding steroid dienone.                        |
| 143 | fr_amide               | Number of amides.                                                                   |
| 144 | fr_amidine             | Number of amidine groups.                                                           |
| 145 | fr_aniline             | Number of anilines.                                                                 |
| 146 | fr_aryl_methyl         | Number of aryl methyl sites for hydroxylation.                                      |
| 147 | fr_azide               | Number of azide groups.                                                             |
| 148 | fr_azo                 | Number of azo groups.                                                               |
| 149 | fr_barbitur            | Number of barbiturate groups.                                                       |
| 150 | fr_benzene             | Number of benzene rings.                                                            |
| 151 | fr_benzodiazepine      | Number of benzodiazepines with no additional fused rings.                           |
| 152 | fr_bicyclic            | Bicyclic.                                                                           |
| 153 | fr_diazo               | Number of diazo groups.                                                             |
| 154 | fr_dihydropyridine     | Number of dihydropyridines.                                                         |
| 155 | fr_epoxide             | Number of epoxide rings.                                                            |
| 156 | fr_ester               | Number of esters.                                                                   |
| 157 | fr_ether               | Number of ether oxygens (including phenoxy).                                        |
| 158 | fr_furan               | Number of furan rings.                                                              |
| 159 | fr_guanido             | Number of guanidine groups.                                                         |
| 160 | fr_halogen             | Number of halogens.                                                                 |
| 161 | fr_hdrzine             | Number of hydrazine groups.                                                         |
| 162 | fr_hdrzone             | Number of hydrazone groups.                                                         |
| 163 | fr_imidazole           | Number of imidazole rings.                                                          |
| 164 | fr_imide               | Number of imide groups.                                                             |
| 165 | fr_isocyan             | Number of isocyanates.                                                              |
| 166 | fr_isothiocyan         | Number of isothiocyanates.                                                          |
| 167 | fr_ketone              | Number of ketones.                                                                  |
| 168 | fr_ketone_Topless      | Number of ketones excluding diaryl, a,b-unsat. dienones, heteroatom on C $\alpha$ . |
| 169 | fr_lactam              | Number of beta lactams.                                                             |
| 170 | fr_lactone             | Number of cyclic esters (lactones).                                                 |
| 171 | fr_methoxy             | Number of methoxy groups -OCH <sub>3</sub> .                                        |
| 172 | fr_morpholine          | Number of morpholine rings.                                                         |
| 173 | fr_nitrile             | Number of nitriles.                                                                 |
| 174 | fr_nitro               | Number of nitro groups.                                                             |
| 175 | fr_nitro_arom          | Number of nitro benzene ring substituents.                                          |
| 176 | fr_nitro_arom_nonortho | Number of non-ortho nitro benzene ring substituents.                                |
| 177 | fr_nitroso             | Number of nitroso groups, excluding NO <sub>2</sub> .                               |
| 178 | fr_oxazole             | Number of oxazole rings.                                                            |
| 179 | fr_oxime               | Number of oxime groups.                                                             |
| 180 | fr_para_hydroxylation  | Number of para-hydroxylation sites.                                                 |

|     |                        |                                                                                    |
|-----|------------------------|------------------------------------------------------------------------------------|
| 181 | fr_phenol              | Number of phenols.                                                                 |
| 182 | fr_phenol_noOrthoHbond | Number of phenolic OH excluding ortho intramolecular Hbond substituents.           |
| 183 | fr_phos_acid           | Number of phosphoric acid groups.                                                  |
| 184 | fr_phos_ester          | Number of phosphoric ester groups.                                                 |
| 185 | fr_piperdine           | Number of piperdine rings.                                                         |
| 186 | fr_piperzine           | Number of piperzine rings.                                                         |
| 187 | fr_priamide            | Number of primary amides.                                                          |
| 188 | fr_prisulfonamd        | Number of primary sulfonamides.                                                    |
| 189 | fr_pyridine            | Number of pyridine rings.                                                          |
| 190 | fr_quatN               | Number of quarternary nitrogens.                                                   |
| 191 | fr_sulfide             | Number of thioether.                                                               |
| 192 | fr_sulfonamd           | Number of sulfonamides.                                                            |
| 193 | fr_sulfone             | Number of sulfone groups.                                                          |
| 194 | fr_term_acetylene      | Number of terminal acetylenes.                                                     |
| 195 | fr_tetrazole           | Number of tetrazole rings.                                                         |
| 196 | fr_thiazole            | Number of thiazole rings.                                                          |
| 197 | fr_thiocyan            | Number of thiocyanates.                                                            |
| 198 | fr_thiophene           | Number of thiophene rings.                                                         |
| 199 | fr_unbrch_alkane       | Number of unbranched alkanes of at least 4 members (excludes halogenated alkanes). |
| 200 | fr_urea                | Number of urea groups.                                                             |

Table S6. Hyper parameters of each tested machine learning models.

| Machine learning approaches | hyper parameters                                                                                                                                                                                                                                                                                                                                                                                                                     |
|-----------------------------|--------------------------------------------------------------------------------------------------------------------------------------------------------------------------------------------------------------------------------------------------------------------------------------------------------------------------------------------------------------------------------------------------------------------------------------|
| Random Forest*              | 'warm_start': False,<br>'oob_score': False,<br>'n_jobs': None,<br>'min_impurity_decrease': 0.0,<br>'verbose': 0,<br>'max_leaf_nodes': None,<br>'bootstrap': True,<br>'min_samples_leaf': 1,<br>'n_estimators': 67,<br>'min_samples_split': 4,<br>'min_weight_fraction_leaf': 0.0,<br>'criterion': 'gini',<br>'random_state': None,<br>'min_impurity_split': None,<br>'max_features': 27,<br>'max_depth': 20,<br>'class_weight': None |
| Logistic Regression         | 'warm_start': False,<br>'C': 1.0,<br>'n_jobs': None,<br>'verbose': 0,<br>'intercept_scaling': 1,<br>'fit_intercept': True,<br>'max_iter': 100,<br>'penalty': 'l2',<br>'multi_class': 'warn',<br>'random_state': None,<br>'dual': False,<br>'tol': 0.0001,<br>'solver': 'warn',<br>'class_weight': None                                                                                                                               |
| Decision Tree               | 'presort': False,<br>'splitter': 'best',<br>'min_impurity_decrease': 0.0,<br>'max_leaf_nodes': None,<br>'min_samples_leaf': 1,<br>'min_samples_split': 2,<br>'min_weight_fraction_leaf': 0.0,                                                                                                                                                                                                                                        |



|                        |                                                                                                                                                                                                                                                                                                                   |
|------------------------|-------------------------------------------------------------------------------------------------------------------------------------------------------------------------------------------------------------------------------------------------------------------------------------------------------------------|
|                        | 'criterion': 'gini',<br>'random_state': None,<br>'min_impurity_split': None,<br>'max_features': None,<br>'max_depth': None,<br>'class_weight': None                                                                                                                                                               |
| Naive Bayes            | 'priors': None,<br>'var_smoothing': 1e-09                                                                                                                                                                                                                                                                         |
| Support Vector Machine | 'kernel': 'rbf',<br>'C': 1.0,<br>'verbose': False,<br>'probability': False,<br>'degree': 3,<br>'shrinking': True,<br>'max_iter': -1,<br>'decision_function_shape': 'ovr',<br>'random_state': None,<br>'tol': 0.001,<br>'cache_size': 200,<br>'coef0': 0.0,<br>'gamma': 'auto_deprecated',<br>'class_weight': None |

\*The hyper parameters for Random Forest was optimized by GridSearchCV function in scikit-learn module and parameters for other approaches were the default in scikit-learn module.

**Table S7.** The detailed version of installed packages.

| Package      | Version             |
|--------------|---------------------|
| certifi      | 2020.4.5.1          |
| joblib       | 0.14.1              |
| mkl-fft      | 1.0.15              |
| mkl-random   | 1.1.0               |
| mkl-service  | 2.3.0               |
| numpy        | 1.18.1              |
| pip          | 20.0.2              |
| scikit-learn | 0.22.1              |
| scipy        | 1.4.1               |
| setuptools   | 46.2.0.post20200511 |
| six          | 1.14.0              |
| wheel        | 0.34.2              |
| wincertstore | 0.2                 |

**Table S8.** The nearest distance between 47 mutation sites and ligand binding atoms.

| NO. | 47 mutation site in consensus RT | Nearest ligand binding atom | Ligand binding region | Distance(Å) |
|-----|----------------------------------|-----------------------------|-----------------------|-------------|
| 1   | 181                              | 124                         | A                     | 2.102       |
| 2   | 184                              | 597                         | B                     | 2.667       |
| 3   | 272                              | 816                         | D                     | 2.963       |
| 4   | 74                               | 723                         | C                     | 3.381       |
| 5   | 162                              | 348                         | A                     | 4.377       |
| 6   | 98                               | 129                         | A                     | 5.587       |
| 7   | 67                               | 691                         | C                     | 5.616       |
| 8   | 101                              | 124                         | A                     | 6.675       |
| 9   | 70                               | 726                         | C                     | 6.980       |
| 10  | 179                              | 124                         | A                     | 7.164       |
| 11  | 293                              | 686                         | C                     | 7.775       |

|    |     |     |   |        |
|----|-----|-----|---|--------|
| 12 | 245 | 657 | C | 7.923  |
| 13 | 60  | 751 | C | 8.446  |
| 14 | 118 | 548 | B | 8.809  |
| 15 | 286 | 686 | C | 9.377  |
| 16 | 69  | 726 | C | 9.718  |
| 17 | 83  | 455 | B | 9.767  |
| 18 | 214 | 548 | B | 9.774  |
| 19 | 102 | 124 | A | 10.254 |
| 20 | 103 | 124 | A | 10.414 |
| 21 | 178 | 312 | A | 10.925 |
| 22 | 190 | 350 | A | 11.586 |
| 23 | 41  | 653 | B | 12.247 |
| 24 | 177 | 124 | A | 12.488 |
| 25 | 228 | 296 | A | 12.491 |
| 26 | 208 | 334 | A | 13.419 |
| 27 | 215 | 597 | B | 13.851 |
| 28 | 277 | 119 | A | 14.420 |
| 29 | 202 | 350 | A | 14.992 |
| 30 | 174 | 334 | A | 15.274 |
| 31 | 44  | 646 | B | 15.827 |
| 32 | 35  | 751 | C | 16.247 |
| 33 | 123 | 455 | B | 17.032 |
| 34 | 122 | 489 | B | 17.039 |
| 35 | 210 | 456 | B | 17.077 |
| 36 | 219 | 634 | B | 17.924 |
| 37 | 20  | 725 | C | 18.058 |
| 38 | 207 | 350 | A | 18.26  |
| 39 | 135 | 751 | C | 18.549 |
| 40 | 203 | 350 | A | 18.567 |
| 41 | 39  | 732 | C | 18.635 |
| 42 | 211 | 334 | A | 18.706 |
| 43 | 142 | 751 | C | 18.813 |
| 44 | 297 | 657 | C | 19.023 |
| 45 | 200 | 350 | A | 20.375 |
| 46 | 43  | 646 | B | 20.553 |
| 47 | 196 | 350 | A | 23.806 |

**Table S9.** The p-value of Mann-Whitney test on the probability value for each class in 10-fold cross validation.

| Machine learning approaches | Cross validation | Number of susceptible pairs | Number of resistant pairs | p-value  |
|-----------------------------|------------------|-----------------------------|---------------------------|----------|
| Random Forest               | 1                | 413                         | 349                       | 1.62E-80 |
|                             | 2                | 426                         | 336                       | 5.24E-82 |
|                             | 3                | 426                         | 336                       | 1.56E-88 |
|                             | 4                | 427                         | 335                       | 4.47E-82 |
|                             | 5                | 422                         | 340                       | 1.42E-91 |
|                             | 6                | 435                         | 327                       | 1.41E-85 |
|                             | 7                | 418                         | 344                       | 4.46E-81 |
|                             | 8                | 444                         | 318                       | 1.21E-86 |
|                             | 9                | 430                         | 332                       | 8.39E-84 |
|                             | 10               | 407                         | 355                       | 1.80E-84 |
|                             | total            | 4250                        | 3375                      | 0.00     |
| Logistic Regression         | 1                | 413                         | 349                       | 3.22E-53 |
|                             | 2                | 426                         | 336                       | 1.92E-58 |
|                             | 3                | 426                         | 336                       | 6.32E-57 |
|                             | 4                | 427                         | 335                       | 7.10E-59 |
|                             | 5                | 422                         | 340                       | 3.03E-65 |
|                             | 6                | 435                         | 327                       | 4.39E-58 |
|                             | 7                | 418                         | 344                       | 5.36E-53 |
|                             | 8                | 444                         | 318                       | 1.10E-61 |
|                             | 9                | 430                         | 332                       | 4.25E-63 |
|                             | 10               | 407                         | 355                       | 3.41E-55 |
|                             | total            | 4250                        | 3375                      | 0.00     |

|                            |       |      |      |           |
|----------------------------|-------|------|------|-----------|
| Decision Tree              | 1     | 413  | 349  | 1.88E-51  |
|                            | 2     | 426  | 336  | 4.92E-54  |
|                            | 3     | 426  | 336  | 2.14E-58  |
|                            | 4     | 427  | 335  | 2.87E-55  |
|                            | 5     | 422  | 340  | 2.33E-60  |
|                            | 6     | 435  | 327  | 1.67E-59  |
|                            | 7     | 418  | 344  | 2.13E-53  |
|                            | 8     | 444  | 318  | 4.69E-55  |
|                            | 9     | 430  | 332  | 2.60E-59  |
|                            | 10    | 407  | 355  | 1.96E-57  |
|                            | total | 4250 | 3375 | 0.00      |
| Naïve Bayes                | 1     | 413  | 349  | 7.56E-23  |
|                            | 2     | 426  | 336  | 6.35E-19  |
|                            | 3     | 426  | 336  | 2.07E-23  |
|                            | 4     | 427  | 335  | 3.01E-24  |
|                            | 5     | 422  | 340  | 7.43E-29  |
|                            | 6     | 435  | 327  | 3.04E-29  |
|                            | 7     | 418  | 344  | 1.79E-20  |
|                            | 8     | 444  | 318  | 7.95E-23  |
|                            | 9     | 430  | 332  | 2.13E-29  |
|                            | 10    | 407  | 355  | 6.66E-25  |
|                            | total | 4250 | 3375 | 4.90E-229 |
| Supporting Vector Machine* | 1     | 413  | 349  | 4.35E-44  |
|                            | 2     | 426  | 336  | 2.08E-47  |
|                            | 3     | 426  | 336  | 1.11E-49  |
|                            | 4     | 427  | 335  | 2.68E-49  |
|                            | 5     | 422  | 340  | 2.38E-53  |
|                            | 6     | 435  | 327  | 4.01E-50  |
|                            | 7     | 418  | 344  | 1.79E-41  |
|                            | 8     | 444  | 318  | 4.09E-51  |
|                            | 9     | 430  | 332  | 2.22E-58  |
|                            | 10    | 407  | 355  | 9.12E-50  |
|                            | total | 4250 | 3375 | 0.00      |

\*Supporting vector machine approach could not provide the prediction probability during classification, alternatively the predicted binary class result was used in this part of test.

**Table S10.** Model performance of the 10 times independent test.

|                      | AUC   | Accuracy | F-score | Precision | Recall |
|----------------------|-------|----------|---------|-----------|--------|
| Independent_split_1  | 0.945 | 0.866    | 0.866   | 0.867     | 0.866  |
| Independent_split_2  | 0.941 | 0.866    | 0.865   | 0.865     | 0.866  |
| Independent_split_3  | 0.946 | 0.869    | 0.869   | 0.869     | 0.869  |
| Independent_split_4  | 0.948 | 0.873    | 0.873   | 0.873     | 0.873  |
| Independent_split_5  | 0.939 | 0.866    | 0.866   | 0.866     | 0.866  |
| Independent_split_6  | 0.951 | 0.880    | 0.880   | 0.880     | 0.880  |
| Independent_split_7  | 0.946 | 0.874    | 0.874   | 0.874     | 0.874  |
| Independent_split_8  | 0.952 | 0.876    | 0.876   | 0.876     | 0.876  |
| Independent_split_9  | 0.944 | 0.875    | 0.875   | 0.876     | 0.875  |
| Independent_split_10 | 0.948 | 0.886    | 0.885   | 0.885     | 0.886  |
| Mean                 | 0.946 | 0.873    | 0.873   | 0.873     | 0.873  |
| Standard Deviation   | 0.004 | 0.007    | 0.007   | 0.006     | 0.007  |

**Table S11.** List of top 40 ranked features.

| Rank | Feature | Sorted importance | Accumulated importance | Growth rate |
|------|---------|-------------------|------------------------|-------------|
| 1    | 210_z2  | 0.031             | 0.031                  | -           |
| 2    | 215_z2  | 0.027             | 0.058                  | 0.881       |
| 3    | 215_z3  | 0.024             | 0.082                  | 0.416       |
| 4    | 41_z2   | 0.024             | 0.106                  | 0.287       |
| 5    | 67_z2   | 0.021             | 0.127                  | 0.201       |

|    |                  |       |       |       |
|----|------------------|-------|-------|-------|
| 6  | 215_z1           | 0.021 | 0.149 | 0.166 |
| 7  | 215_z5           | 0.020 | 0.169 | 0.134 |
| 8  | 215_z4           | 0.019 | 0.187 | 0.111 |
| 9  | 210_z5           | 0.018 | 0.205 | 0.095 |
| 10 | 41_z4            | 0.018 | 0.222 | 0.086 |
| 11 | 184_z5           | 0.017 | 0.239 | 0.076 |
| 12 | 41_z5            | 0.016 | 0.255 | 0.065 |
| 13 | 184_z2           | 0.015 | 0.270 | 0.059 |
| 14 | 67_z5            | 0.015 | 0.285 | 0.055 |
| 15 | 210_z1           | 0.015 | 0.300 | 0.052 |
| 16 | 184_z3           | 0.015 | 0.315 | 0.049 |
| 17 | 184_z1           | 0.014 | 0.329 | 0.046 |
| 18 | 41_z3            | 0.014 | 0.343 | 0.043 |
| 19 | 184_z4           | 0.013 | 0.356 | 0.039 |
| 20 | 41_z1            | 0.013 | 0.369 | 0.036 |
| 21 | 210_z4           | 0.011 | 0.380 | 0.031 |
| 22 | 67_z3            | 0.008 | 0.389 | 0.022 |
| 23 | 67_z4            | 0.008 | 0.397 | 0.020 |
| 24 | 70_z1            | 0.008 | 0.404 | 0.019 |
| 25 | 118_z4           | 0.007 | 0.411 | 0.018 |
| 26 | 219_z5           | 0.007 | 0.418 | 0.017 |
| 27 | 219_z3           | 0.007 | 0.425 | 0.017 |
| 28 | FpDensityMorgan2 | 0.007 | 0.432 | 0.015 |
| 29 | 219_z2           | 0.006 | 0.438 | 0.015 |
| 30 | 70_z5            | 0.006 | 0.444 | 0.014 |
| 31 | SMR_VSA5         | 0.006 | 0.451 | 0.014 |
| 32 | 70_z4            | 0.006 | 0.457 | 0.013 |
| 33 | 219_z1           | 0.006 | 0.463 | 0.013 |
| 34 | 70_z2            | 0.006 | 0.468 | 0.013 |
| 35 | SlogP_VSA1       | 0.006 | 0.474 | 0.012 |
| 36 | 228_z1           | 0.005 | 0.479 | 0.012 |
| 37 | 67_z1            | 0.005 | 0.485 | 0.011 |
| 38 | VSA_EState9      | 0.005 | 0.490 | 0.011 |
| 39 | FpDensityMorgan1 | 0.005 | 0.495 | 0.010 |
| 40 | 69_z4            | 0.005 | 0.500 | 0.010 |

**Table S12.**  $SD(s_i)$  values on 10 important sites and 37 mutation sites.

|                   | sites | Drug  |       |       |       |       |       |
|-------------------|-------|-------|-------|-------|-------|-------|-------|
|                   |       | 3TC   | ABC   | AZT   | D4T   | DDI   | TDF   |
| 10 dominant sites | 41    | 0.140 | 0.165 | 0.194 | 0.184 | 0.111 | 0.145 |
|                   | 67    | 0.125 | 0.107 | 0.156 | 0.149 | 0.087 | 0.116 |
|                   | 69    | 0.047 | 0.038 | 0.055 | 0.064 | 0.050 | 0.053 |
|                   | 70    | 0.063 | 0.026 | 0.080 | 0.048 | 0.016 | 0.054 |
|                   | 118   | 0.067 | 0.096 | 0.101 | 0.121 | 0.094 | 0.080 |
|                   | 184   | 0.191 | 0.156 | 0.062 | 0.035 | 0.103 | 0.009 |
|                   | 210   | 0.101 | 0.137 | 0.144 | 0.160 | 0.103 | 0.120 |
|                   | 215   | 0.153 | 0.159 | 0.201 | 0.173 | 0.105 | 0.129 |
|                   | 219   | 0.085 | 0.070 | 0.096 | 0.083 | 0.055 | 0.074 |
|                   | 228   | 0.051 | 0.052 | 0.066 | 0.074 | 0.053 | 0.064 |
| 37 mutation sites | 20    | 0.015 | 0.022 | 0.023 | 0.025 | 0.022 | 0.008 |
|                   | 35    | 0.025 | 0.010 | 0.016 | 0.009 | 0.010 | 0.013 |
|                   | 39    | 0.035 | 0.043 | 0.045 | 0.056 | 0.041 | 0.041 |
|                   | 43    | 0.045 | 0.060 | 0.065 | 0.077 | 0.057 | 0.064 |
|                   | 44    | 0.040 | 0.058 | 0.060 | 0.073 | 0.056 | 0.049 |
|                   | 60    | 0.001 | 0.017 | 0.023 | 0.027 | 0.010 | 0.040 |
|                   | 74    | 0.043 | 0.057 | 0.034 | 0.044 | 0.066 | 0.012 |
|                   | 83    | 0.039 | 0.031 | 0.021 | 0.022 | 0.028 | 0.017 |
|                   | 98    | 0.021 | 0.024 | 0.025 | 0.025 | 0.014 | 0.040 |
|                   | 101   | 0.017 | 0.016 | 0.017 | 0.020 | 0.022 | 0.019 |
|                   | 102   | 0.005 | 0.006 | 0.010 | 0.006 | 0.003 | 0.015 |
|                   | 103   | 0.037 | 0.023 | 0.030 | 0.030 | 0.031 | 0.028 |
|                   | 122   | 0.040 | 0.057 | 0.050 | 0.055 | 0.040 | 0.038 |
|                   | 123   | 0.006 | 0.006 | 0.010 | 0.007 | 0.005 | 0.011 |

|     |       |       |       |       |       |       |
|-----|-------|-------|-------|-------|-------|-------|
| 135 | 0.014 | 0.033 | 0.033 | 0.032 | 0.022 | 0.042 |
| 142 | 0.016 | 0.012 | 0.014 | 0.011 | 0.014 | 0.004 |
| 162 | 0.011 | 0.017 | 0.017 | 0.017 | 0.014 | 0.012 |
| 174 | 0.011 | 0.006 | 0.009 | 0.005 | 0.004 | 0.003 |
| 177 | 0.013 | 0.003 | 0.005 | 0.005 | 0.008 | 0.008 |
| 178 | 0.014 | 0.012 | 0.014 | 0.011 | 0.012 | 0.007 |
| 179 | 0.018 | 0.020 | 0.020 | 0.023 | 0.017 | 0.014 |
| 181 | 0.044 | 0.019 | 0.020 | 0.029 | 0.036 | 0.009 |
| 190 | 0.029 | 0.024 | 0.026 | 0.032 | 0.025 | 0.030 |
| 196 | 0.017 | 0.026 | 0.019 | 0.026 | 0.022 | 0.019 |
| 200 | 0.008 | 0.008 | 0.008 | 0.011 | 0.009 | 0.009 |
| 202 | 0.005 | 0.001 | 0.001 | 0.002 | 0.003 | 0.005 |
| 203 | 0.033 | 0.039 | 0.046 | 0.053 | 0.034 | 0.039 |
| 207 | 0.012 | 0.010 | 0.013 | 0.017 | 0.013 | 0.018 |
| 208 | 0.040 | 0.055 | 0.055 | 0.070 | 0.055 | 0.047 |
| 211 | 0.021 | 0.028 | 0.028 | 0.038 | 0.016 | 0.024 |
| 214 | 0.005 | 0.012 | 0.017 | 0.018 | 0.002 | 0.010 |
| 245 | 0.017 | 0.013 | 0.012 | 0.008 | 0.005 | 0.011 |
| 272 | 0.018 | 0.002 | 0.010 | 0.003 | 0.005 | 0.006 |
| 277 | 0.011 | 0.018 | 0.022 | 0.021 | 0.010 | 0.026 |
| 286 | 0.007 | 0.003 | 0.007 | 0.010 | 0.004 | 0.011 |
| 293 | 0.024 | 0.015 | 0.018 | 0.017 | 0.003 | 0.014 |
| 297 | 0.014 | 0.014 | 0.020 | 0.013 | 0.008 | 0.014 |

**Table S13.** The t-test result between  $SD(s_i)$  values on top 10 important sites and  $SD(s_i)$  on 37 other mutation sites.

| Drug | p-value                 | Drug | p-value                 |
|------|-------------------------|------|-------------------------|
| 3TC  | 4.59×10 <sup>-4**</sup> | D4T  | 9.21×10 <sup>-4**</sup> |
| ABC  | 1.01×10 <sup>-3**</sup> | DDI  | 2.33×10 <sup>-4**</sup> |
| AZT  | 4.30×10 <sup>-4**</sup> | TDF  | 9.96×10 <sup>-4**</sup> |

\*\*statistically significant (p value &lt; 0.01).

**Table S14.** Binding ability between each drug and mutated protein variants for each detected mutation pattern.

| Drug | Protein      | mutation pattern <sup>‡</sup> | Top1 FullFitness | Relative FullFitness <sup>‡</sup> | New pattern detected in predicted drug-resistant proteins <sup>‡</sup> |
|------|--------------|-------------------------------|------------------|-----------------------------------|------------------------------------------------------------------------|
| 3TC  | variant 1    | LDTKVVLTKL                    | -3655.82         | 11.051                            |                                                                        |
| 3TC  | variant 2    | LDTKVWVYKL                    | -3658.164        | 8.707                             |                                                                        |
| 3TC  | variant 3    | MDTKVVLTKL                    | -3666.981        | -0.11                             |                                                                        |
| 3TC  | consensus RT | MDTKVMLTKL                    | -3666.871        | 0                                 |                                                                        |
| ABC  | variant 1    | LNTKIVWYNL                    | -3479.942        | 50.632                            | New pattern                                                            |
| ABC  | consensus RT | MDTKVMLTKL                    | -3530.574        | 0                                 |                                                                        |
| AZT  | variant 1    | LDTKVVLTKL                    | -3676.221        | 8.661                             |                                                                        |
| AZT  | consensus RT | MDTKVMLTKL                    | -3684.882        | 0                                 |                                                                        |
| TDF  | variant 1    | LDTKVWVYKL                    | -3692.176        | 6.845                             |                                                                        |
| TDF  | variant 2    | LNTKIMWYKL                    | -3684.688        | 14.333                            | New pattern                                                            |
| TDF  | variant 3    | LNDKIVWYKL                    | -3693.079        | 5.942                             | New pattern                                                            |
| TDF  | variant 4    | LNTKIMWYRL                    | -3676.074        | 22.947                            |                                                                        |
| TDF  | variant 5    | LNTKVWVYKL                    | -3697.397        | 1.624                             |                                                                        |
| TDF  | variant 6    | LNTKIVWYKL                    | -3683.263        | 15.758                            |                                                                        |
| TDF  | consensus RT | MDTKVMLTKL                    | -3699.021        | 0                                 |                                                                        |

<sup>‡</sup>Mutation patterns were the joint fragment of residues on sites 41,67,69,70,118,184,210,215,219,228 on RT sequence. <sup>‡</sup>The Relative Fullfitness score was calculated as the difference between the raw Fullfitness score of the drug-mutated protein and the raw Fullfitness score of the corresponding drug-consensus RT. <sup>‡</sup>The new pattern detected in predicted drug-resistant proteins listed the protein patterns that have not been occurred in the drug-protein pairs with experiment result.

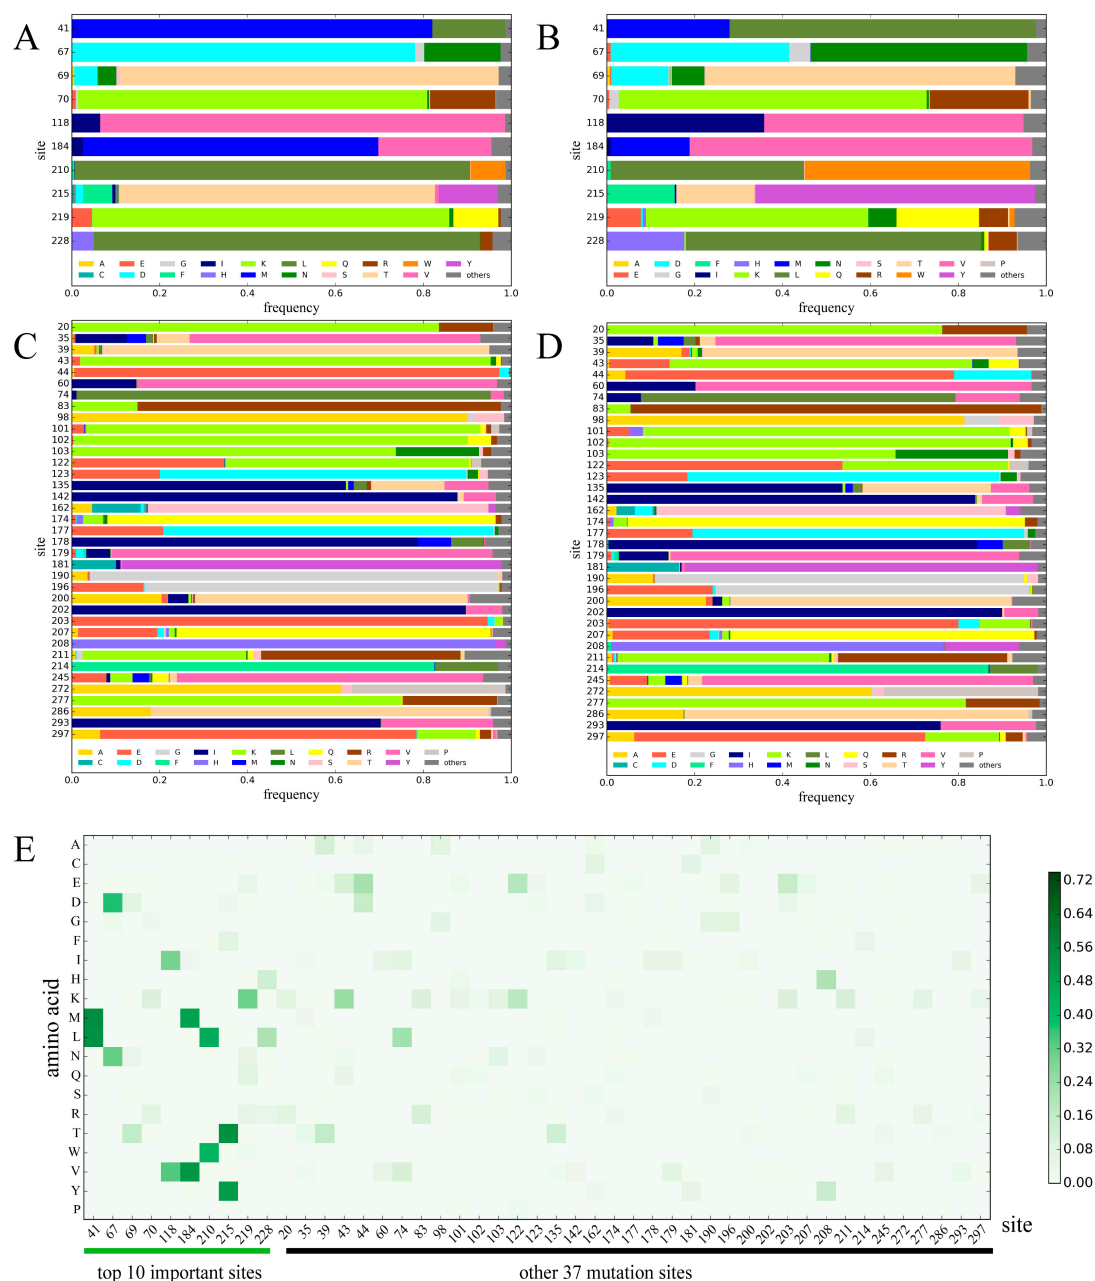

**Figure S1.** Amino acid distribution and frequency changes of ABC-susceptible and ABC-resistant proteins on 47 sites. Sub-graphs A and B show the amino acid frequency on 10 dominant sites for ABC-susceptible proteins and ABC-resistant proteins respectively. Sub-graphs C and D show the amino acid frequency on 37 mutation sites for ABC-susceptible proteins and ABC-resistant proteins respectively. Sub-graph E illustrates the absolute difference of residue frequency on each sites between ABC-susceptible and ABC-resistant proteins. X axis refers to each mutation sites. Y axis refers to 20 amino acids. Each pixel refers to the value of  $DF(a_i, s_j)$  for each amino acid  $a_i$  on 47 sites  $s_j$ . The color of each pixel correlate to the value of  $DF(a_i, s_j)$ .

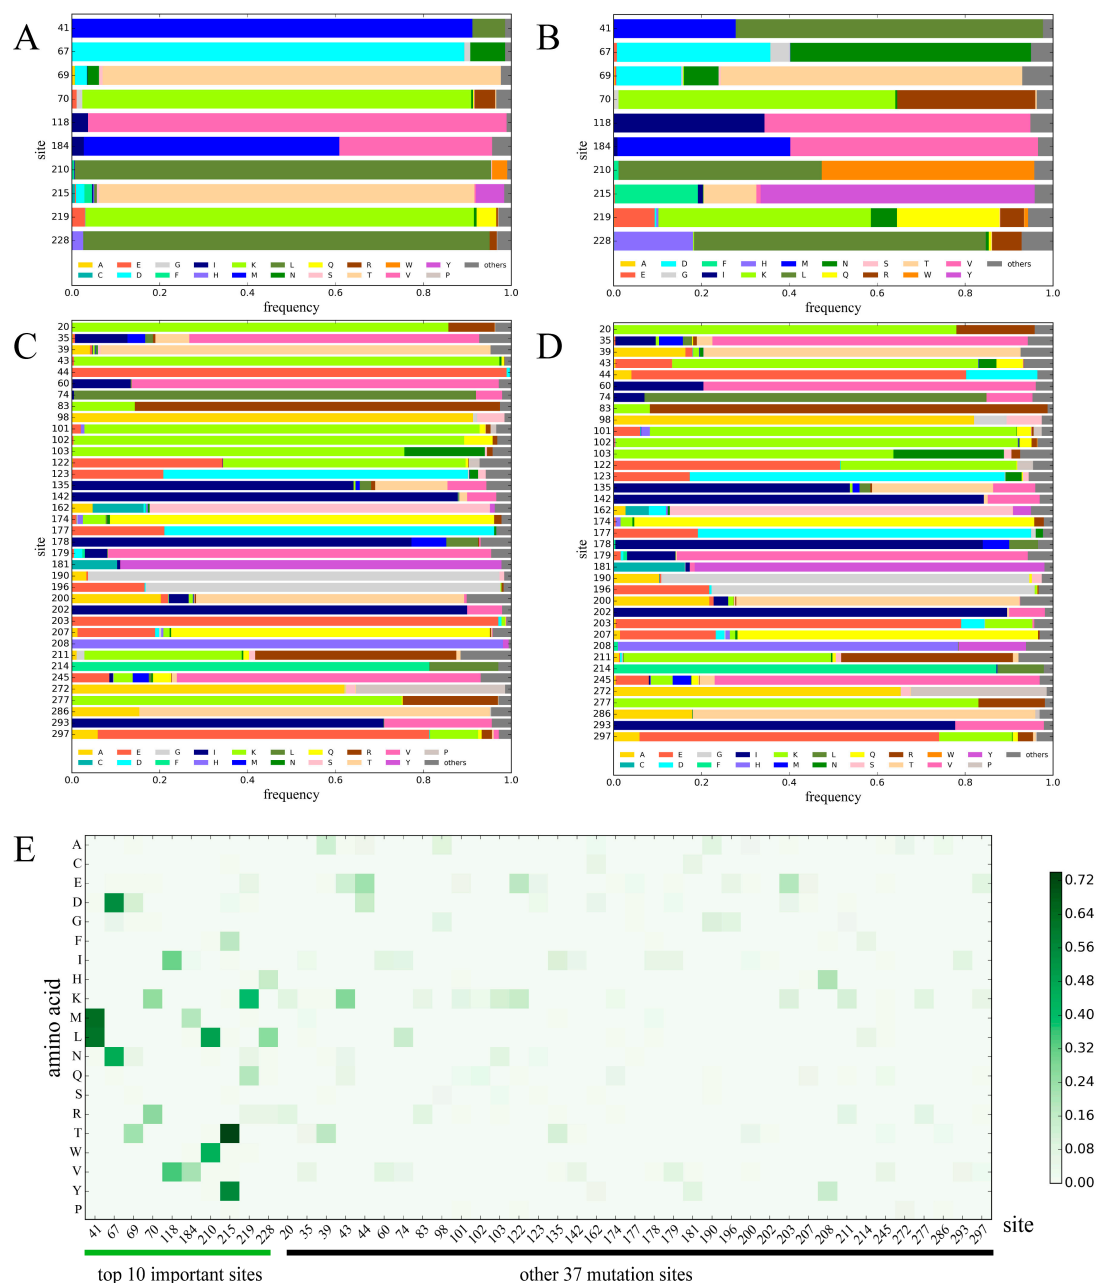

**Figure S2.** Amino acid distribution and frequency changes of AZT-susceptible and AZT-resistant proteins on 47 sites. Sub-graphs A and B show the amino acid frequency on 10 dominant sites for AZT-susceptible proteins and AZT-resistant proteins respectively. Sub-graphs C and D show the amino acid frequency on 37 mutation sites for AZT-susceptible proteins and AZT-resistant proteins respectively. Sub-graph E illustrates the absolute difference of residue frequency on each sites between AZT-susceptible and AZT-resistant proteins. X axis refers to each mutation sites. Y axis refers to 20 amino acids. Each pixel refers to the value of  $DF(a_i, s_j)$  for each amino acid  $a_i$  on 47 sites  $s_j$ . The color of each pixel correlate to the value of  $DF(a_i, s_j)$ .

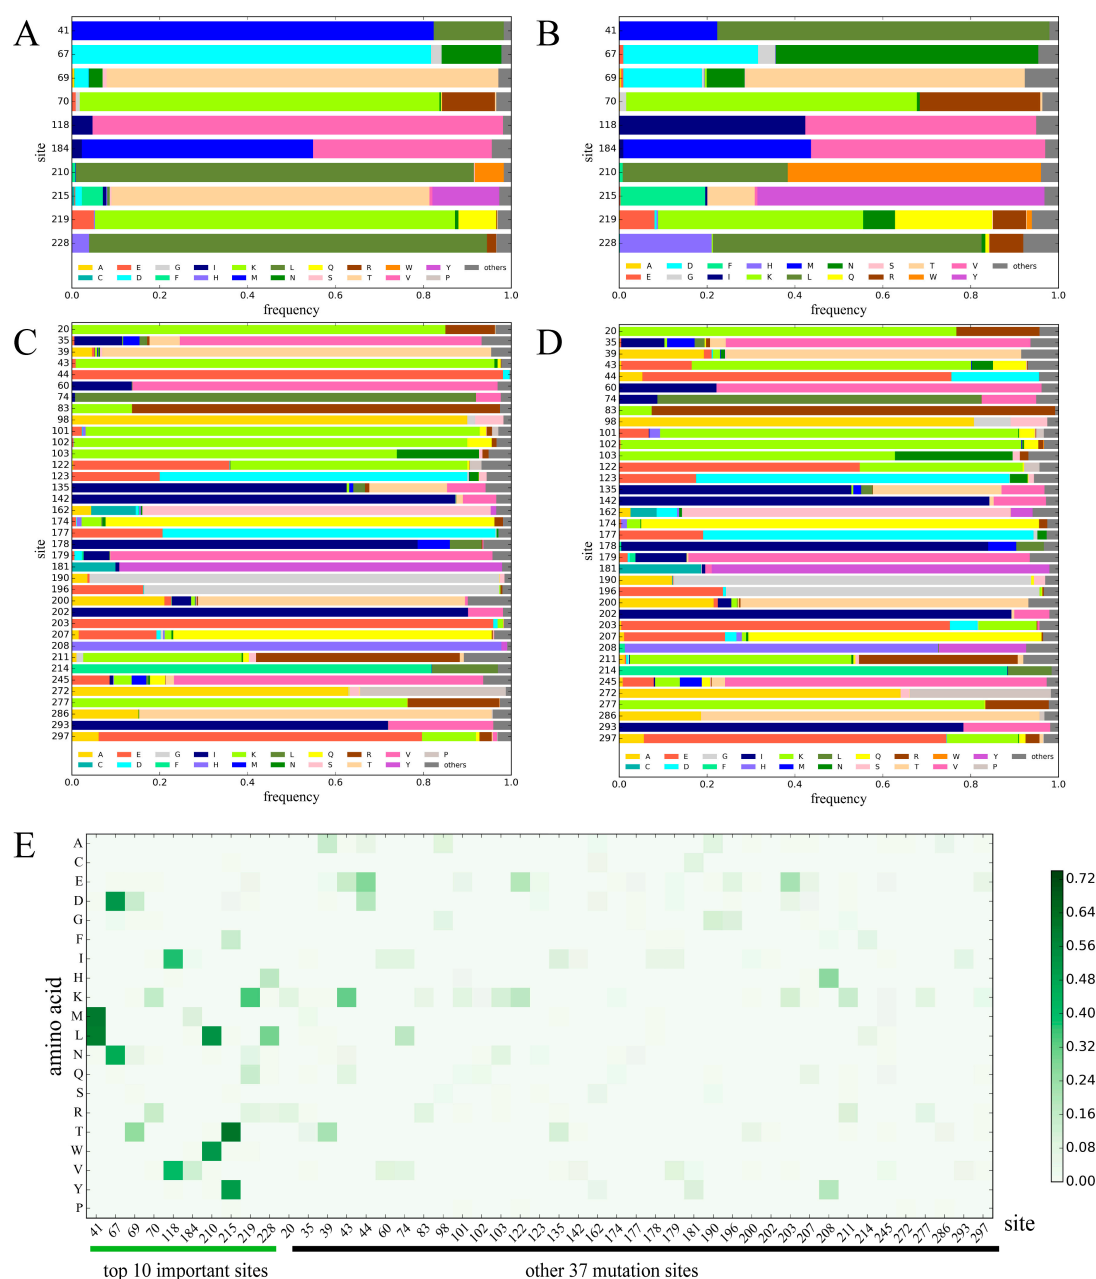

**Figure S3.** Amino acid distribution and frequency changes of D4T-susceptible and D4T-resistant proteins on 47 sites. Sub-graphs A and B show the amino acid frequency on 10 dominant sites for D4T-susceptible proteins and D4T-resistant proteins respectively. Sub-graphs C and D show the amino acid frequency on 37 mutation sites for D4T-susceptible proteins and D4T-resistant proteins respectively. Sub-graph E illustrates the absolute difference of residue frequency on each sites between D4T-susceptible and D4T-resistant proteins. X axis refers to each mutation sites. Y axis refers to 20 amino acids. Each pixel refers to the value of  $DF(a_i, s_j)$  for each amino acid  $a_i$  on 47 sites  $s_j$ . The color of each pixel correlate to the value of  $DF(a_i, s_j)$ .



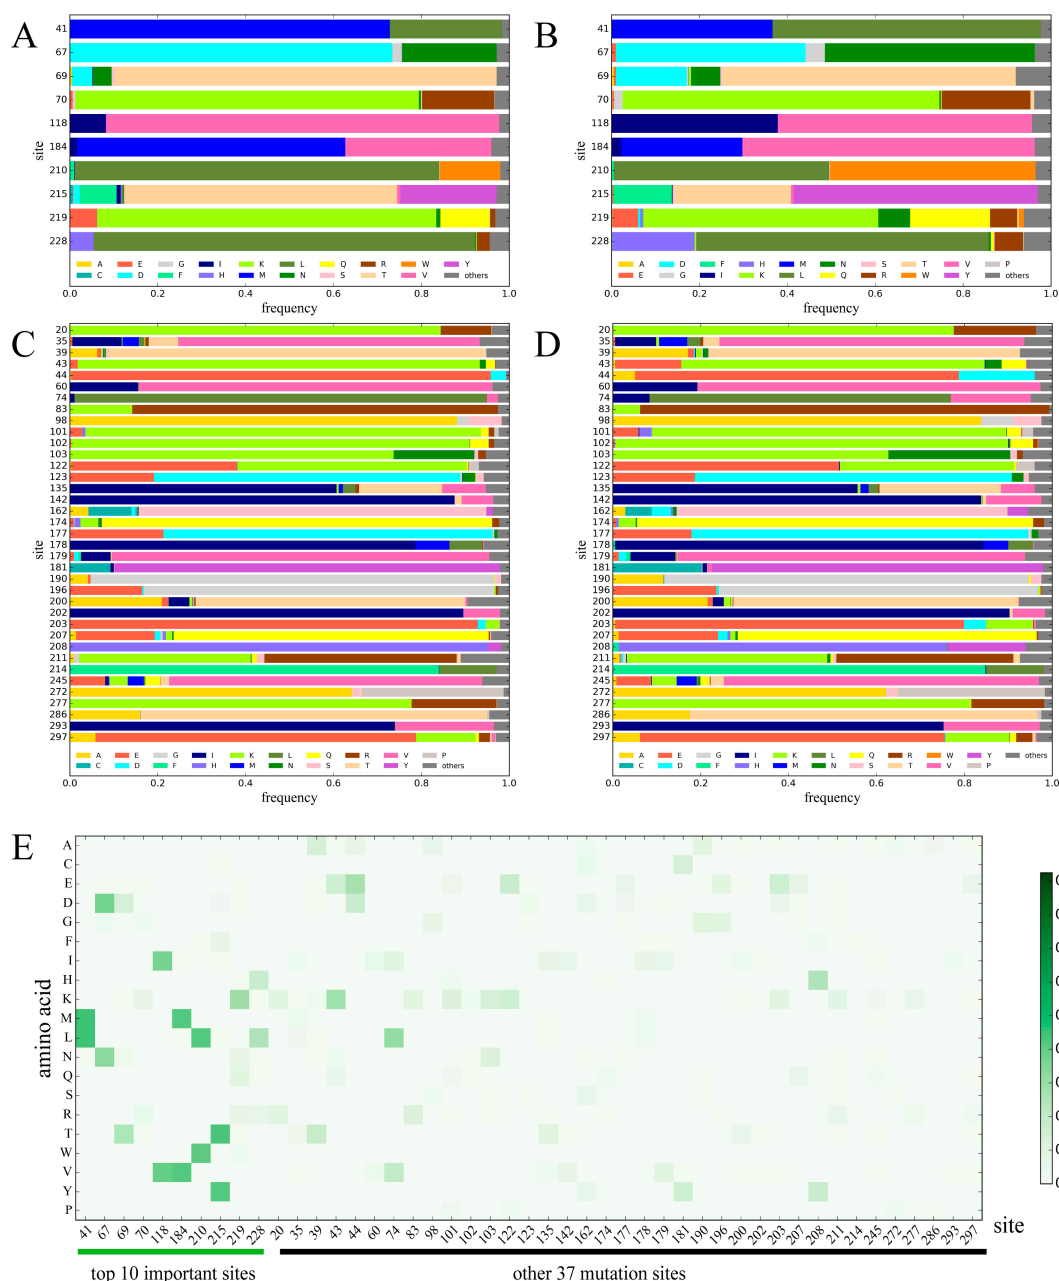

**Figure S4.** Amino acid distribution and frequency changes of DDI-susceptible and DDI-resistant proteins on 47 sites. Sub-graphs A and B show the amino acid frequency on 10 dominant sites for DDI-susceptible proteins and DDI-resistant proteins respectively. Sub-graphs C and D show the amino acid frequency on 37 mutation sites for DDI-susceptible proteins and DDI-resistant proteins respectively. Sub-graph E illustrates the absolute difference of residue frequency on each sites between DDI-susceptible and DDI-resistant proteins. X axis refers to each mutation sites. Y axis refers to 20 amino acids. Each pixel refers to the value of  $DF(a_i, s_j)$  for each amino acid  $a_i$  on 47 sites  $s_j$ . The color of each pixel correlate to the value of  $DF(a_i, s_j)$ .

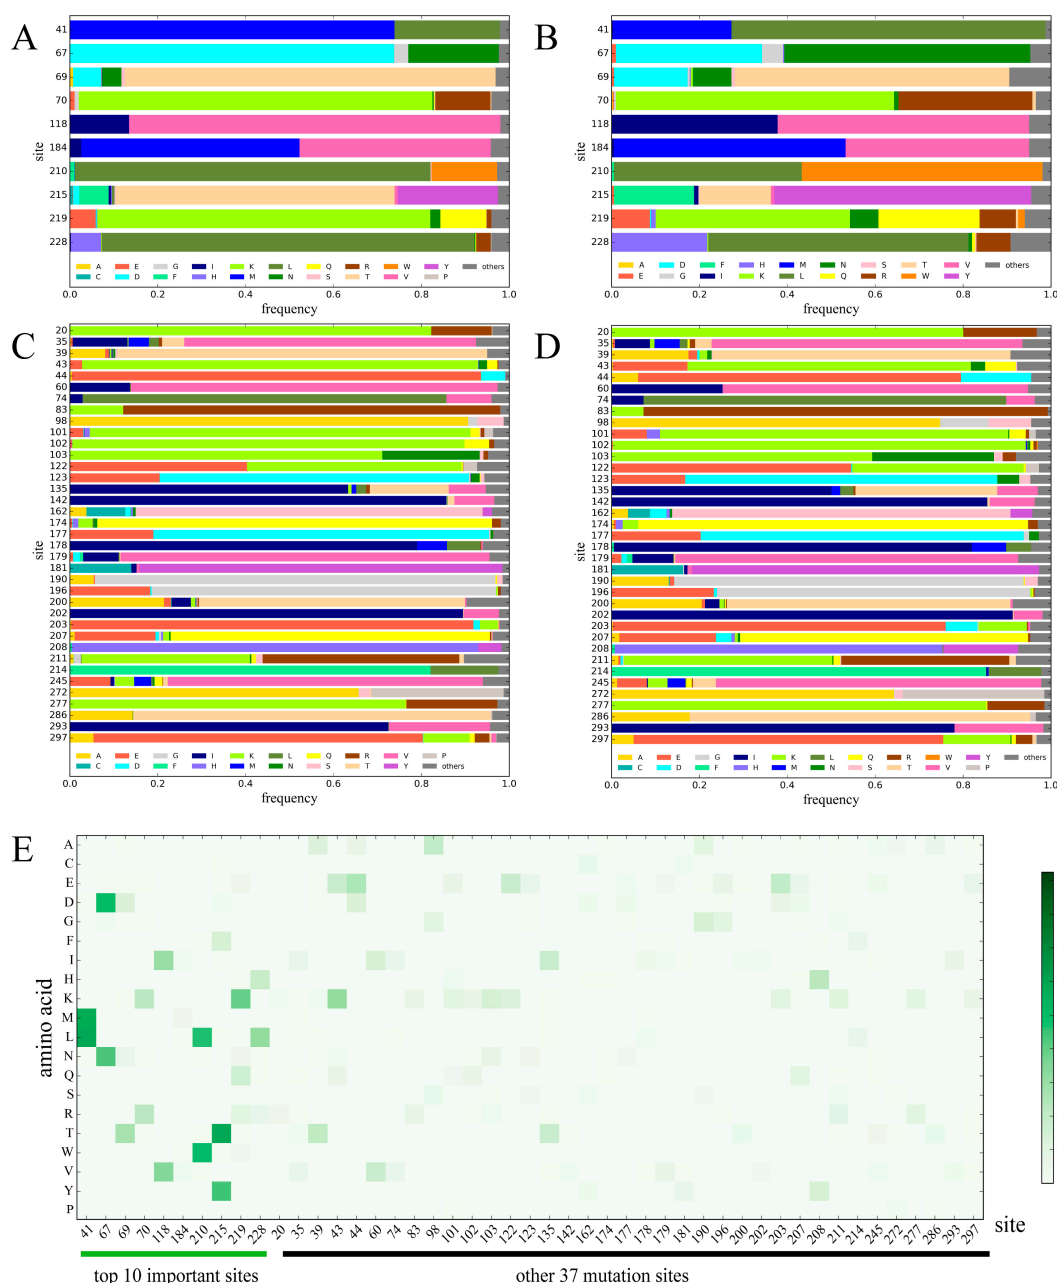

**Figure S5.** Amino acid distribution and frequency changes of TDF-susceptible and TDF-resistant proteins on 47 sites. Sub-graphs A and B show the amino acid frequency on 10 dominant sites for TDF-susceptible proteins and TDF-resistant proteins respectively. Sub-graphs C and D show the amino acid frequency on 37 mutation sites for TDF-susceptible proteins and TDF-resistant proteins respectively. Sub-graph E illustrates the absolute difference of residue frequency on each sites between TDF-susceptible and TDF-resistant proteins. X axis refers to each mutation sites. Y axis refers to 20 amino acids. Each pixel refers to the value of  $DF(a_i, s_j)$  for each amino acid  $a_i$  on 47 sites  $s_j$ . The color of each pixel correlate to the value of  $DF(a_i, s_j)$ .

## Reference:

1. O. Tarasova, N. Biziukova, D. Filimonov, and V. Poroikov, "A Computational Approach for the Prediction of HIV Resistance Based on Amino Acid and Nucleotide Descriptors," *Molecules*, vol. 23, no. 11, Nov, 2018.
